# Supplementary material for: Sustainability Consequences of Making Land Change Decisions Based on Current Climatology in the Brazilian Cerrados
Source: MDPI journal article supplement (doi:10.3390/land12040914), 2023-04-19
Supplement: s1 [file s1]

Archive with 1 entries (1 files):
- land-2251889-supplementary.pdf
