# Supplementary material for: Sustainability Consequences of Making Land Change Decisions Based on Current Climatology in the Brazilian Cerrados
Source: MDPI journal article supplement (doi:10.3390/land12040914), 2023-04-19
Supplement: s1 [file s1 › land-2251889-supplementary.pdf]

# Sustainability consequences of making land change decisions based on current climatology in the Brazilian Cerrados

Daniel S Silva<sup>1\*</sup>, Eugenio Y Arima<sup>1</sup>

<sup>1</sup> University of Texas at Austin, Department of Geography and the environment, TX, USA

\* Corresponding author: danielsilva@utexas.edu

## Appendices

### A. Weight of Evidence and land change modeling

| From              | To        | Matopiba | Soy belt | Central area | West   | Southeast |
|-------------------|-----------|----------|----------|--------------|--------|-----------|
| Native vegetation | Pasture   | 0.0092   | 0.0068   | 0.0295       | 0.0198 | 0.0229    |
|                   | Crops     | 0.0037   | 0.0110   | 0.0022       | 0.0026 | 0.0033    |
| Pasture           | Nat. Veg. | 0.0386   | 0.0286   | 0.0261       | 0.0224 | 0.0315    |
|                   | Crops     | 0.0024   | 0.0618   | 0.0129       | 0.0081 | 0.0172    |
| Crops             | Nat. Veg. | 0.0063   | 0.0042   | 0.0068       | 0.0059 | 0.0089    |
|                   | Pasture   | 0.0029   | 0.0031   | 0.0084       | 0.0066 | 0.0076    |

Table S1. Results of annual transition probabilities matrix by land cover and subregion. Source: Author's analysis in Dinamica EGO.

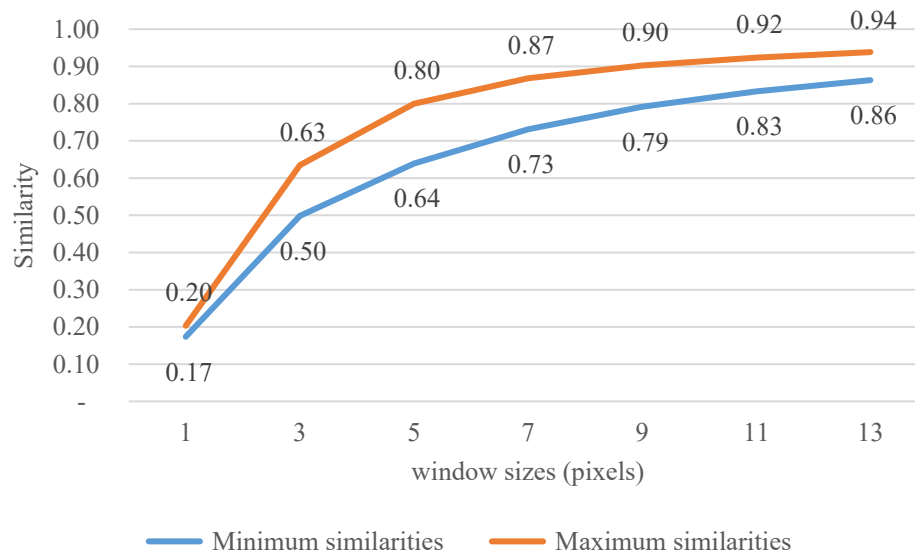

Figure S1: Similarity between land use simulation and current land use for Cerrado in 2016, with subregions at cluster level. Source: Author's analysis in Dinamica EGO.

| Window sizes | Minimum similarities | Maximum similarities |
|--------------|----------------------|----------------------|
| <b>1</b>     | 0.08                 | 0.50                 |
| <b>3</b>     | 0.19                 | 0.80                 |
| <b>5</b>     | 0.33                 | 0.90                 |
| <b>7</b>     | 0.45                 | 0.93                 |
| <b>9</b>     | 0.54                 | 0.94                 |
| <b>11</b>    | 0.61                 | 0.95                 |
| <b>13</b>    | 0.67                 | 0.95                 |

Table S2. Similarity between land use simulation and current land use for Cerrado in 2016, without subregional models.

| Window sizes | Minimum similarities | Maximum similarities |
|--------------|----------------------|----------------------|
| <b>1</b>     | 0.09                 | 0.48                 |
| <b>3</b>     | 0.24                 | 0.77                 |
| <b>5</b>     | 0.39                 | 0.88                 |
| <b>7</b>     | 0.51                 | 0.92                 |
| <b>9</b>     | 0.60                 | 0.94                 |
| <b>11</b>    | 0.67                 | 0.95                 |
| <b>13</b>    | 0.71                 | 0.96                 |

Table S3. Similarity between land use simulation and current land use for Cerrado in 2016, with subregions at the municipal level.

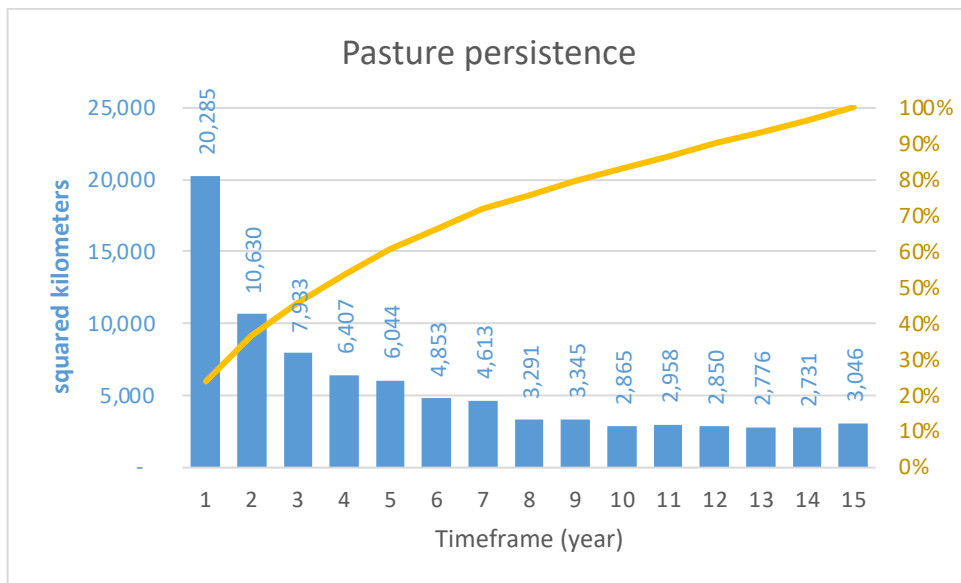

Table S4. Pasture persistence (turnover): timeframe that deforested areas to pasture turn into cropland in the Cerrado biome, from 2001 to 2016.

| <b>Transition from</b> | <b>Transition to</b> | <b>First variable</b> | <b>Second variable</b> | <b>Cramer</b> |
|------------------------|----------------------|-----------------------|------------------------|---------------|
| Native vegetation      | Pasture              | Distance to Pasture   | Protected Areas        | 0.384         |
| Native vegetation      | Cropland             | Protected Areas       | roads                  | 0.246         |
| Native vegetation      | Pasture              | Protected Areas       | roads                  | 0.241         |
| Native vegetation      | Cropland             | Distance to Crops     | Protected Areas        | 0.228         |
| Pasture                | Cropland             | Distance to Crops     | Protected Areas        | 0.223         |
| Pasture                | Cropland             | Protected Areas       | roads                  | 0.208         |
| Native vegetation      | Pasture              | Protected Areas       | suitability            | 0.148         |
| Native vegetation      | Cropland             | Protected Areas       | suitability            | 0.148         |
| Pasture                | Cropland             | Protected Areas       | suitability            | 0.148         |
| Native vegetation      | Cropland             | Distance to Crops     | suitability            | 0.146         |
| Pasture                | Cropland             | Distance to Crops     | suitability            | 0.145         |
| Native vegetation      | Pasture              | Distance to Pasture   | roads                  | 0.126         |
| Native vegetation      | Pasture              | Distance to Pasture   | suitability            | 0.111         |
| Native vegetation      | Cropland             | slope                 | suitability            | 0.105         |
| Native vegetation      | Pasture              | slope                 | suitability            | 0.099         |
| Pasture                | Cropland             | slope                 | suitability            | 0.094         |
| Native vegetation      | Pasture              | Protected Areas       | slope                  | 0.091         |
| Native vegetation      | Cropland             | Protected Areas       | slope                  | 0.09          |
| Pasture                | Cropland             | Distance to Crops     | roads                  | 0.086         |
| Pasture                | Cropland             | Protected Areas       | slope                  | 0.078         |
| Native vegetation      | Pasture              | roads                 | suitability            | 0.072         |
| Native vegetation      | Cropland             | roads                 | suitability            | 0.07          |
| Pasture                | Cropland             | roads                 | suitability            | 0.065         |
| Native vegetation      | Pasture              | Distance to Pasture   | slope                  | 0.063         |
| Pasture                | Cropland             | roads                 | slope                  | 0.061         |
| Native vegetation      | Cropland             | Distance to Crops     | roads                  | 0.058         |
| Pasture                | Cropland             | Distance to Crops     | slope                  | 0.055         |
| Native vegetation      | Cropland             | roads                 | slope                  | 0.052         |
| Native vegetation      | Cropland             | Distance to Crops     | slope                  | 0.047         |
| Native vegetation      | Pasture              | roads                 | slope                  | 0.044         |

Table S5. Cramer's V test to assess the spatial correlation between the variables.

## B. Water yield model and future climate data

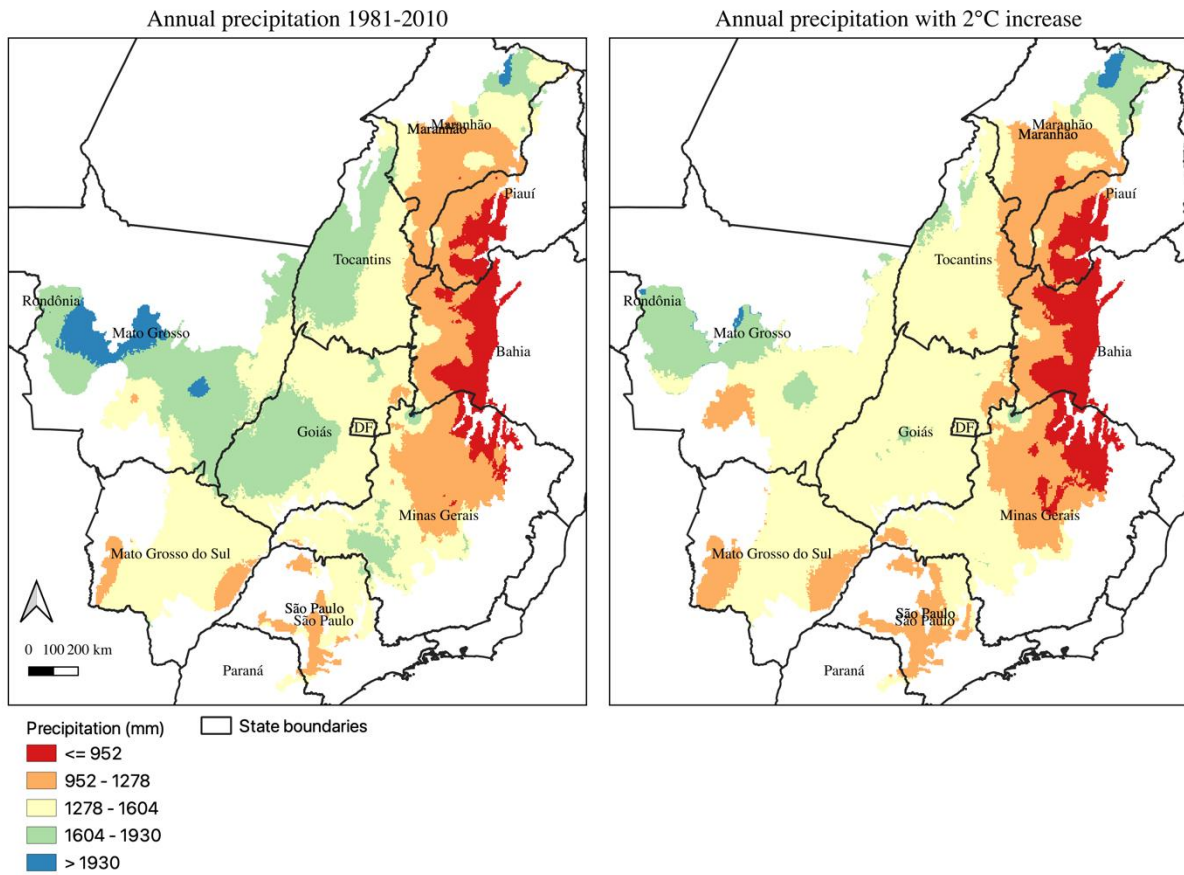

Figure S2. Precipitation (mm/year) for historical and future climate scenarios. Source: adapted from Terraclimate Project (Abatzoglou et al., 2018).

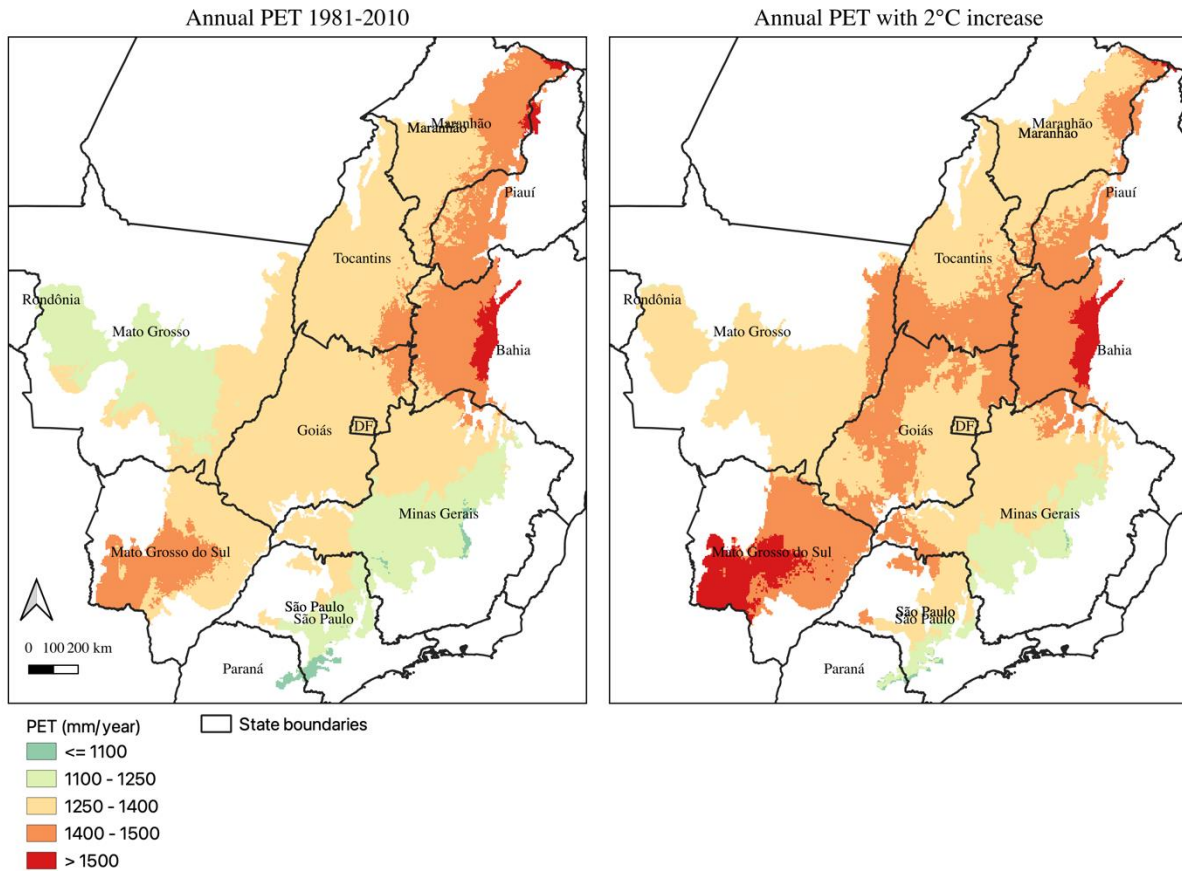

Figure S3. Potential evapotranspiration (PET, in mm/year) for historical and future climate scenarios. Source: adapted from Terraclimate Project (Abatzoglou et al., 2018).

## References

Abatzoglou, J.T., S.Z. Dobrowski, S.A. Parks, K.C. Hegewisch. (2018). Terraclimate, a high-resolution global dataset of monthly climate and climatic water balance from 1958-2015. Scientific Data. Available at: <https://www.nature.com/articles/sdata2017191>
